# Supplementary material for: Genetic Diversity, Biofilm Formation, and Antibiotic Resistance of Pseudomonas aeruginosa Isolated from Cow, Camel, and Mare with Clinical Endometritis
Source: MDPI journal article supplement (doi:10.3390/vetsci9050239), 2022-05-16
Supplement: s1 [file s1]

| Antibiotic name         | Breakpoints  | Isolates       | Number | %R   | %R 95%CI  | MIC50 | MIC90 | Geom.Mean | MIC Range | <= .001 | 0.016 | 0.032 | 0.064 | 0.125 | 0.25 | 0.5 | 1  | 2 | 4 | 8  | 16 | 32 | 64 | 128 | 256 | 512 |
|-------------------------|--------------|----------------|--------|------|-----------|-------|-------|-----------|-----------|---------|-------|-------|-------|-------|------|-----|----|---|---|----|----|----|----|-----|-----|-----|
| Piperacillin            | S<=16 R>=128 | All isolates   | 54     | 77.8 | 64.1-87.5 | 128   | 512   | 120.043   | 8 - 512   |         |       |       |       |       |      |     |    |   | 5 | 7  |    |    | 17 | 14  | 11  |     |
|                         |              | cow isolates   | 15     | 73.3 | 44.8-91.1 | 128   | 512   | 97.006    | 8 - 512   |         |       |       |       |       |      |     |    |   | 2 | 2  |    |    | 6  | 2   | 3   |     |
|                         |              | camel isolates | 17     | 88.2 | 62.2-97.9 | 256   | 512   | 177.366   | 16 - 512  |         |       |       |       |       |      |     |    |   |   | 2  |    |    | 5  | 6   | 4   |     |
|                         |              | mare isolates  | 12     | 83.3 | 50.8-97.0 | 128   | 512   | 143.675   | 8 - 512   |         |       |       |       |       |      |     |    |   | 1 | 1  |    |    | 4  | 3   | 3   |     |
|                         |              | water isolates | 10     | 60   | 27.4-86.3 | 128   | 256   | 68.593    | 8 - 512   |         |       |       |       |       |      |     |    |   | 2 | 2  |    |    | 2  | 3   | 1   |     |
| Piperacillin/Tazobactam | S<=16 R>=128 | All isolates   | 54     | 59.3 | 45.1-72.2 | 128   | 256   | 50.797    | 2 - 512   |         |       |       |       |       |      |     |    | 1 | 1 | 12 | 8  |    | 22 | 9   | 1   |     |
|                         |              | cow isolates   | 15     | 40   | 17.5-67.1 | 8     | 256   | 25.398    | 2 - 256   |         |       |       |       |       |      |     |    | 1 |   | 7  | 1  |    | 4  | 2   |     |     |
|                         |              | camel isolates | 17     | 58.8 | 33.4-80.6 | 128   | 256   | 54.369    | 8 - 512   |         |       |       |       |       |      |     |    |   | 3 | 4  |    |    | 8  | 1   | 1   |     |
|                         |              | mare isolates  | 12     | 83.3 | 50.8-97.0 | 128   | 256   | 101.594   | 4 - 256   |         |       |       |       |       |      |     |    |   | 1 |    | 1  |    | 6  | 4   |     |     |
|                         |              | water isolates | 10     | 60   | 27.4-86.3 | 128   | 256   | 55.715    | 8 - 256   |         |       |       |       |       |      |     |    |   |   | 2  |    |    | 4  | 2   |     |     |
| Ceftazidime             | S<=8 R>=32   | All isolates   | 54     | 38.9 | 26.2-53.1 | 8     | 64    | 15.466    | 2 - 164   |         |       |       |       |       |      |     |    | 2 | 8 | 23 |    | 3  | 15 | 3   |     |     |
|                         |              | cow isolates   | 15     | 40   | 17.5-67.1 | 8     | 64    | 13.3      | 2 - 64    |         |       |       |       |       |      |     |    | 2 | 1 | 6  |    | 2  | 4  |     |     |     |
|                         |              | camel isolates | 17     | 35.3 | 15.3-61.4 | 8     | 128   | 16.911    | 4 - 164   |         |       |       |       |       |      |     |    |   | 2 | 9  |    |    | 4  | 2   |     |     |
|                         |              | mare isolates  | 12     | 58.3 | 28.6-83.5 | 32    | 64    | 25.398    | 4 - 128   |         |       |       |       |       |      |     |    |   | 1 | 4  |    | 1  | 5  | 1   |     |     |
|                         |              | water isolates | 10     | 20   | 3.5-55.8  | 8     | 64    | 9.19      | 4 - 64    |         |       |       |       |       |      |     |    |   |   | 4  | 4  |    | 2  |     |     |     |
| Aztreonam               | S<=8 R>=32   | All isolates   | 54     | 38.9 | 26.2-53.1 | 8     | 64    | 14.692    | 2 - 164   |         |       |       |       |       |      |     |    | 1 | 9 | 23 |    | 7  | 12 | 2   |     |     |
|                         |              | cow isolates   | 15     | 40   | 17.5-67.1 | 8     | 64    | 12.126    | 2 - 64    |         |       |       |       |       |      |     |    | 1 | 4 | 4  |    | 3  | 3  |     |     |     |
|                         |              | camel isolates | 17     | 35.3 | 15.3-61.4 | 8     | 64    | 14.964    | 4 - 164   |         |       |       |       |       |      |     |    |   | 2 | 9  |    | 2  | 3  | 1   |     |     |
|                         |              | mare isolates  | 12     | 58.3 | 28.6-83.5 | 32    | 64    | 23.973    | 4 - 128   |         |       |       |       |       |      |     |    |   | 1 | 4  |    | 2  | 4  | 1   |     |     |
|                         |              | water isolates | 10     | 20   | 3.5-55.8  | 8     | 64    | 10.556    | 4 - 64    |         |       |       |       |       |      |     |    |   |   | 6  |    |    |    |     |     |     |
| Imipenem                | S<=2 R>=8    | All isolates   | 54     | 14.8 | 7.0-27.7  | 1     | 8     | 1.293     | 0.125 - 8 |         |       |       |       | 1     |      | 8   | 30 | 7 |   | 8  |    |    |    |     |     |     |
|                         |              | cow isolates   | 15     | 13.3 | 2.3-41.6  | 1     | 8     | 1.203     | 0.125 - 8 |         |       |       |       | 1     |      | 2   | 7  | 3 |   | 2  |    |    |    |     |     |     |
|                         |              | camel isolates | 17     | 17.6 | 4         |       |       |           |           |         |       |       |       |       |      |     |    |   |   |    |    |    |    |     |     |     |

| Antibiotic name         | Breakpoints   | Isolates       | Number | %R   | %R 95%CI  | MIC50 | MIC90 | Geom.Mean | MIC Range     | <= .001 | 0.016 | 0.032 | 0.064 | 0.125 | 0.25 | 0.5 | 1  | 2  | 4  | 8  | 16 | 32 | 64 | 128 | 256 | 512 |
|-------------------------|---------------|----------------|--------|------|-----------|-------|-------|-----------|---------------|---------|-------|-------|-------|-------|------|-----|----|----|----|----|----|----|----|-----|-----|-----|
| Piperacillin            | S<=16 R>=128  | All isolates   | 54     | 77.8 | 64.1-87.5 | 128   | 512   | 120.043   | 8 - 512       |         |       |       |       |       |      |     |    |    | 5  | 7  |    |    | 17 | 14  | 11  |     |
|                         |               | cow isolates   | 15     | 73.3 | 44.8-91.1 | 128   | 512   | 97.006    | 8 - 512       |         |       |       |       |       |      |     |    |    | 2  | 2  |    |    | 6  | 2   | 3   |     |
|                         |               | camel isolates | 17     | 88.2 | 62.2-97.9 | 256   | 512   | 177.366   | 16 - 512      |         |       |       |       |       |      |     |    |    |    | 2  |    |    | 5  | 6   | 4   |     |
|                         |               | mare isolates  | 12     | 83.3 | 50.8-97.0 | 128   | 512   | 143.675   | 8 - 512       |         |       |       |       |       |      |     |    |    |    | 1  | 1  |    | 4  | 3   | 3   |     |
|                         |               | water isolates | 10     | 60   | 27.4-86.3 | 128   | 256   | 68.593    | 8 - 512       |         |       |       |       |       |      |     |    |    |    | 2  | 2  |    | 2  | 3   | 1   |     |
| Piperacillin/Tazobactam | S<=16 R>=128  | All isolates   | 54     | 59.3 | 45.1-72.2 | 128   | 256   | 50.797    | 2 - 512       |         |       |       |       |       |      |     |    | 1  | 1  | 12 | 8  |    | 22 | 9   | 1   |     |
|                         |               | cow isolates   | 15     | 40   | 17.5-67.1 | 8     | 256   | 25.398    | 2 - 256       |         |       |       |       |       |      |     |    | 1  |    | 7  | 1  |    | 4  | 2   |     |     |
|                         |               | camel isolates | 17     | 58.8 | 33.4-80.6 | 128   | 256   | 54.369    | 8 - 512       |         |       |       |       |       |      |     |    |    |    | 3  | 4  |    | 8  | 1   | 1   |     |
|                         |               | mare isolates  | 12     | 83.3 | 50.8-97.0 | 128   | 256   | 101.594   | 4 - 256       |         |       |       |       |       |      |     |    |    | 1  |    | 1  |    | 6  | 4   |     |     |
|                         |               | water isolates | 10     | 60   | 27.4-86.3 | 128   | 256   | 55.715    | 8 - 256       |         |       |       |       |       |      |     |    |    |    | 2  | 2  |    | 3  | 15  | 3   |     |
| Ceftazidime             | S<=8 R>=32    | All isolates   | 54     | 38.9 | 26.2-53.1 | 8     | 64    | 15.466    | 2 - 164       |         |       |       |       |       |      |     |    | 2  | 8  | 23 |    |    |    |     |     |     |
|                         |               | cow isolates   | 15     | 40   | 17.5-67.1 | 8     | 64    | 13.3      | 2 - 64        |         |       |       |       |       |      |     |    | 2  | 1  | 6  |    | 2  | 4  |     |     |     |
|                         |               | camel isolates | 17     | 35.3 | 15.3-61.4 | 8     | 128   | 16.911    | 4 - 164       |         |       |       |       |       |      |     |    |    |    | 2  | 9  |    | 4  | 2   |     |     |
|                         |               | mare isolates  | 12     | 58.3 | 28.6-83.5 | 32    | 64    | 25.398    | 4 - 128       |         |       |       |       |       |      |     |    |    |    | 1  | 4  |    | 1  | 5   | 1   |     |
|                         |               | water isolates | 10     | 20   | 3.5-55.8  | 8     | 64    | 9.19      | 4 - 64        |         |       |       |       |       |      |     |    |    |    |    |    |    |    |     |     |     |
| Aztreonam               | S<=8 R>=32    | All isolates   | 54     | 38.9 | 26.2-53.1 | 8     | 64    | 14.692    | 2 - 164       |         |       |       |       |       |      |     |    | 1  | 9  | 23 |    | 7  | 12 | 2   |     |     |
|                         |               | cow isolates   | 15     | 40   | 17.5-67.1 | 8     | 64    | 12.126    | 2 - 64        |         |       |       |       |       |      |     |    | 1  | 4  | 4  |    | 3  | 3  |     |     |     |
|                         |               | camel isolates | 17     | 35.3 | 15.3-61.4 | 8     | 64    | 14.964    | 4 - 164       |         |       |       |       |       |      |     |    |    |    | 2  | 9  |    | 2  | 3   | 1   |     |
|                         |               | mare isolates  | 12     | 58.3 | 28.6-83.5 | 32    | 64    | 23.973    | 4 - 128       |         |       |       |       |       |      |     |    |    |    | 1  | 4  |    | 2  | 4   | 1   |     |
|                         |               | water isolates | 10     | 20   | 3.5-55.8  | 8     | 64    | 10.556    | 4 - 64        |         |       |       |       |       |      |     |    |    |    |    | 6  |    |    |     |     |     |
| Imipenem                | S<=2 R>=8     | All isolates   | 54     | 14.8 | 7.0-27.7  | 1     | 8     | 1.293     | 0.125 - 8     |         |       |       |       | 1     |      | 8   | 30 | 7  |    | 8  |    |    |    |     |     |     |
|                         |               | cow isolates   | 15     | 13.3 | 2.3-41.6  | 1     | 8     | 1.203     | 0.125 - 8     |         |       |       |       | 1     |      | 2   | 7  | 3  |    | 2  |    |    |    |     |     |     |
|                         |               | camel isolates | 17     | 17.6 | 4.6-44.1  | 1     | 8     | 1.566     | 0.5 - 8       |         |       |       |       |       |      | 2   | 8  | 4  |    | 3  |    |    |    |     |     |     |
|                         |               | mare isolates  | 12     | 25   | 6.7-57.2  | 1     | 8     | 1.587     | 0.5 - 8       |         |       |       |       |       |      | 1   | 8  |    |    | 3  |    |    |    |     |     |     |
|                         |               | water isolates | 10     | 0    | 0.0-34.5  | 1     | 1     | 0.812     | 0.5 - 1       |         |       |       |       |       |      | 3   | 7  |    |    |    |    |    |    |     |     |     |
| Amikacin                | S<=16 R>=64   | All isolates   | 54     | 50   | 36.3-63.7 | 16    | 128   | 30.011    | 2 - 256       |         |       |       |       |       |      |     |    | 1  | 3  | 15 | 8  |    | 10 | 15  | 2   |     |
|                         |               | cow isolates   | 15     | 53.3 | 27.4-77.7 | 64    | 256   | 27.858    | 2 - 256       |         |       |       |       |       |      |     |    | 1  | 2  | 4  |    |    | 3  | 3   | 2   |     |
|                         |               | camel isolates | 17     | 52.9 | 28.5-76.1 | 64    | 128   | 34.719    | 8 - 128       |         |       |       |       |       |      |     |    |    |    | 4  | 4  |    | 4  | 5   |     |     |
|                         |               | mare isolates  | 12     | 33.3 | 11.3-64.5 | 16    | 128   | 22.627    | 4 - 128       |         |       |       |       |       |      |     |    |    | 1  | 3  | 4  |    | 1  | 3   |     |     |
|                         |               | water isolates | 10     | 60   | 27.4-86.3 | 64    | 128   | 36.758    | 8 - 128       |         |       |       |       |       |      |     |    |    |    |    | 4  |    | 2  | 4   |     |     |
| Gentamicin              | S<=4 R>=16    | All isolates   | 54     | 50   | 36.3-63.7 | 4     | 32    | 8.752     | 2 - 64        |         |       |       |       |       |      |     |    | 21 | 6  | 4  |    | 18 | 5  |     |     |     |
|                         |               | cow isolates   | 15     | 53.3 | 27.4-77.7 | 16    | 64    | 10.079    | 2 - 64        |         |       |       |       |       |      |     |    | 5  | 2  | 1  |    | 5  | 2  |     |     |     |
|                         |               | camel isolates | 17     | 52.9 | 28.5-76.1 | 16    | 32    | 9.417     | 2 - 64        |         |       |       |       |       |      |     |    | 6  | 2  | 1  |    | 7  | 1  |     |     |     |
|                         |               | mare isolates  | 12     | 33.3 | 11.3-64.5 | 2     | 32    | 5.657     | 2 - 64        |         |       |       |       |       |      |     |    | 6  | 2  |    |    | 1  | 2  | 1   |     |     |
|                         |               | water isolates | 10     | 60   | 27.4-86.3 | 16    | 32    | 10.556    | 2 - 64        |         |       |       |       |       |      |     |    | 4  |    |    | 1  | 4  | 1  |     |     |     |
| Ciprofloxacin           | S<=5 R>=2     | All isolates   | 54     | 59.3 | 45.1-72.2 | 2     | 8     | 1.414     | 0.125 - 16    |         |       |       |       | 8     | 3    | 11  |    | 8  | 13 | 10 | 1  |    |    |     |     |     |
|                         |               | cow isolates   | 15     | 66.7 | 38.7-87.0 | 4     | 8     | 2         | 0.125 - 16    |         |       |       |       | 2     |      | 3   |    | 2  | 3  | 4  | 1  |    |    |     |     |     |
|                         |               | camel isolates | 17     | 58.8 | 33.4-80.6 | 4     | 8     | 1.386     | 0.125 - 8     |         |       |       |       | 4     |      | 3   |    | 1  | 5  | 4  |    |    |    |     |     |     |
|                         |               | mare isolates  | 12     | 83.3 | 50.8-97.0 | 2     | 8     | 2.378     | 0.25 - 8      |         |       |       |       |       | 1    | 1   |    | 4  | 4  | 2  |    |    |    |     |     |     |
|                         |               | water isolates | 10     | 20   | 3.5-55.8  | 0.5   | 2     | 0.467     | 0.125 - 4     |         |       |       |       |       | 2    | 2   | 4  |    | 1  | 1  |    |    |    |     |     |     |
| Colistin                | S<= .001 R>=4 | All isolates   | 54     | 0    | 0.0-8.3   | 0.001 | 0.001 | 0.001     | 0.001 - 0.001 | 54      |       |       |       |       |      |     |    |    |    |    |    |    |    |     |     |     |
|                         |               | cow isolates   | 15     | 0    | 0.0-25.3  | 0.001 | 0.001 | 0.001     | 0.001 - 0.001 | 15      |       |       |       |       |      |     |    |    |    |    |    |    |    |     |     |     |
|                         |               | camel isolates | 17     | 0    | 0.0-22.9  | 0.001 | 0.001 | 0.001     | 0.001 - 0.001 | 17      |       |       |       |       |      |     |    |    |    |    |    |    |    |     |     |     |
|                         |               | mare isolates  | 12     | 0    | 0.0-30.1  | 0.001 | 0.001 | 0.001     | 0.001 - 0.001 | 12      |       |       |       |       |      |     |    |    |    |    |    |    |    |     |     |     |
|                         |               | water isolates | 10     | 0    | 0.0-34.5  | 0.001 | 0.001 | 0.001     | 0.001 - 0.001 | 10      |       |       |       |       |      |     |    |    |    |    |    |    |    |     |     |     |

Table S2: Primer and probes used for amplification of different genes in *P. aeruginosa* isolates.

| Genes         | Oligo    | Oligonucleotide sequences (5'-3')           | References |
|---------------|----------|---------------------------------------------|------------|
| lasB          | lasB-F   | CATGTCGGAGAACGCTTCG                         | [66]       |
|               | lasB-R   | GGCTTCACCGAGCAGAACTC                        |            |
|               | lasB-P   | FAM-CATTCCGCTGATTGCCCGC-BHQ1                |            |
| toxA          | toxA-F   | ACCCGGCGAAGCATGAC                           |            |
|               | toxA-R   | GGGAAATGCAGGCGATGAC                         |            |
|               | toxA-P   | HEX -TGGACATCAAGCCACGGTCATCA -BHQ1          |            |
| lasR          | lasR-F   | CAGCCGGGAGAAGGAAGTG                         |            |
|               | lasR-R   | TCCGAGCAGTTGCAGATAACC                       |            |
|               | lasR-P   | FAM-TGCGCCATCGGCAAGACCAGT-BHQ1              |            |
| rhlR          | rhlR-F   | GCTGCGTTGCATGATCGAG                         |            |
|               | rhlR-R   | CAGACCGGGTTGGACATCAG                        |            |
|               | rhlR-P   | HEX- TGCTGACCCAGAAGCTGACCGACC BHQ1          |            |
| gyrB          | gyrB-F   | CCT GAC CAT CCG TCG CCA CAA                 | [55]       |
|               | gyrB-R   | CGC AGC AGG ATG CCG ACG CC                  |            |
|               | gyrB-P   | FAM-CCG TGG TGG TAG ACC TGT TCC CAG ACC-BHQ |            |
| CTX-M         | CTX-M-F  | ATGAGYACCAGTAARGTKATGGC                     |            |
|               | CTX-M-R  | ATCACKCGGRTCGCCIGGRAT                       |            |
|               | CTX-M-P  | FAM-CCCAGACAGCTGGGAGACGAAACGT-BBQ           |            |
| SHV           | SHV-F    | TCCCATGATGAGCACCTTTAA                       |            |
|               | SHV-R    | TCCTGCTGGCGATAGTGGAT                        |            |
|               | SHV-P    | FAM-TGCCGGTGACGAACAGCTGGAG-BBQ              |            |
| TEM           | TEM-F    | GCATCTTACGGATGGCATGA                        |            |
|               | TEM-R    | GTCCTCCGATCGTTGTCAGAA                       |            |
|               | TEM-P    | FAM-CAGTGCTGCCATAACCATGAGTGA-BHQ1           |            |
| IMP           | IMP-F    | GGGCGGAATAGAGTGGCTTA                        |            |
|               | IMP-R    | GGCTTGAACCTTACCGTCTTTT                      |            |
|               | IMP-P    | FAM-CGATCTATCCCCACGTATGCATCTGAATTAACA-BHQ1  |            |
| VIM           | VIM-F    | TGCGCTTCGGTCCAGTAGA                         |            |
|               | VIM-R    | TGACGGGACGTATACAACCAGAT                     |            |
|               | VIM-P    | FAM-CTTCTATCCTGGTGCTGCGCATTCG-BHQ1          |            |
| 16S rRNA      | 27F      | AGAGTTTGATCCTGGCTCAG                        | [56]       |
|               | 1492R    | TACGGYTACCTTGTTACGACTT                      |            |
| CTX-M group I | CTXM1-F3 | GAC GAT GTC ACT GGC TGA GC                  | [63]       |
|               | CTXM1-R2 | AGC CG C CGA CGC TAA TAC A                  |            |
| CTX-M group I | TOHO1-2F | GCG ACC TGG TTA ACT ACA ATC C               |            |
|               | TOHO1-1R | CGG TAG TAT TGC CCT TAA GCC                 |            |
| CTX-M group I | CTXM825F | CGC TTT GCC ATG TGC AGC ACC                 |            |
|               | CTXM825R | GCT CAG TAC GAT CGA GCC                     |            |
| CTX-M group I | CTXM914F | GCT GGA GAA AAG CAG CGG AG                  |            |
|               | CTXM914R | GTA AGC TGA CGC AAC GTC TG                  |            |

## Reference

55. Hosu, M.C.; Vasaikar, S.D.; Okuthe, G.E.; Apalata, T.J. Detection of extended spectrum beta-lactamase genes in *Pseudomonas aeruginosa* isolated from patients in rural Eastern Cape Province, South Africa. *Sci. Rep.* 2021, 11, 7110.
56. Weisburg, W.G.; Barns, S.M.; Pelletier, D.A.; Lane, D.J. 16S ribosomal DNA amplification for phylogenetic study. *J. Bacteriol.* 1991, 173, 697 – 703. <https://doi.org/10.1128/jb.173.2.697-703.1991>.
63. Pitout, J.D.; Thomson, K.S.; Hanson, N.D.; Ehrhardt, A.F.; Moland, E.S.; Sanders, C.C. beta-Lactamases responsible for resistance to expanded-spectrum cephalosporins in *Klebsiella pneumoniae*, *Escherichia coli*, and *Proteus mirabilis* isolates recovered in South Africa. *Antimicrob. Agents Chemother.* 1998, 42, 1350 – 1354. <https://doi.org/10.1128/aac.42.6.1350>.
66. Golpayegani, A.; Nodehi, R.N.; Rezaei, F.; Alimohammadi, M.; Douraghi, M.J. Real-time polymerase chain reaction assays for rapid detection and virulence evaluation of the environmental *Pseudomonas aeruginosa* isolates. *Mol. Biol. Rep.* 2019, 46, 4049 – 4061.
